# Supplementary material for: Defect-Engineering of 2D Dichalcogenide VSe2 to Enhance Ammonia Sensing: Acumens from DFT Calculations
Source: MDPI journal article supplement (doi:10.3390/bios13020257), 2023-02-11
Supplement: s1 [file s1]

# Defect-engineering of 2D dichalcogenide VSe<sub>2</sub> to enhance ammonia sensing: Acumens from DFT Calculations

Gopal Sanyal<sup>1</sup>, Surinder Pal Kaur<sup>2</sup>, Chandra Sekhar Rout<sup>3\*</sup>, Brahmananda Chakraborty<sup>4,5\*</sup>

<sup>1</sup> Mechanical Metallurgy Division, Bhabha Atomic Research Centre, Trombay, Mumbai 400085, India

<sup>2</sup> Department of Chemistry, Indian Institute of Technology Ropar, Rupnagar 140001, India

<sup>3</sup> Centre for Nano and Material Sciences, Jain Global Campus, Jakkasandra, Ramanagaram, Bangalore 562112, India

<sup>4</sup> High Pressure and Synchrotron Radiation Physics Division, Bhabha Atomic Research Centre, Trombay, Mumbai 400085, India

<sup>5</sup> Homi Bhabha National Institute, Mumbai 400094, India

\* Correspondence: brahma@barc.gov.in

## Supporting information

Table S1. Adsorption energies for the adsorption of NH<sub>3</sub> on VSe<sub>2</sub> at different sites

| System                            | Site for placing N atom of NH <sub>3</sub> on VSe <sub>2</sub> above 2 Å from surface | Adsorption energy (eV) |
|-----------------------------------|---------------------------------------------------------------------------------------|------------------------|
| VSe <sub>2</sub> +NH <sub>3</sub> | V atom                                                                                | 0.124                  |
| VSe <sub>2</sub> +NH <sub>3</sub> | Se atom                                                                               | 0.135                  |
| VSe <sub>2</sub> +NH <sub>3</sub> | V-Se bond                                                                             | 0.218                  |
| VSe <sub>2</sub> +NH <sub>3</sub> | Centre of hexagonal ring consisting of V and Se atoms                                 | 0.147                  |
